# Supplementary material for: Comprehensive analysis of serum tumor markers and BRCA1/2 germline mutations in Chinese ovarian cancer patients
Source: PubMed Central journal article supplement (PMC6565576; doi:10.1002/mgg3.672), 2019-04-10

Supporting Figure 1. Verification of deleterious germline mutations of *BRCA1/2* by Sanger sequencing

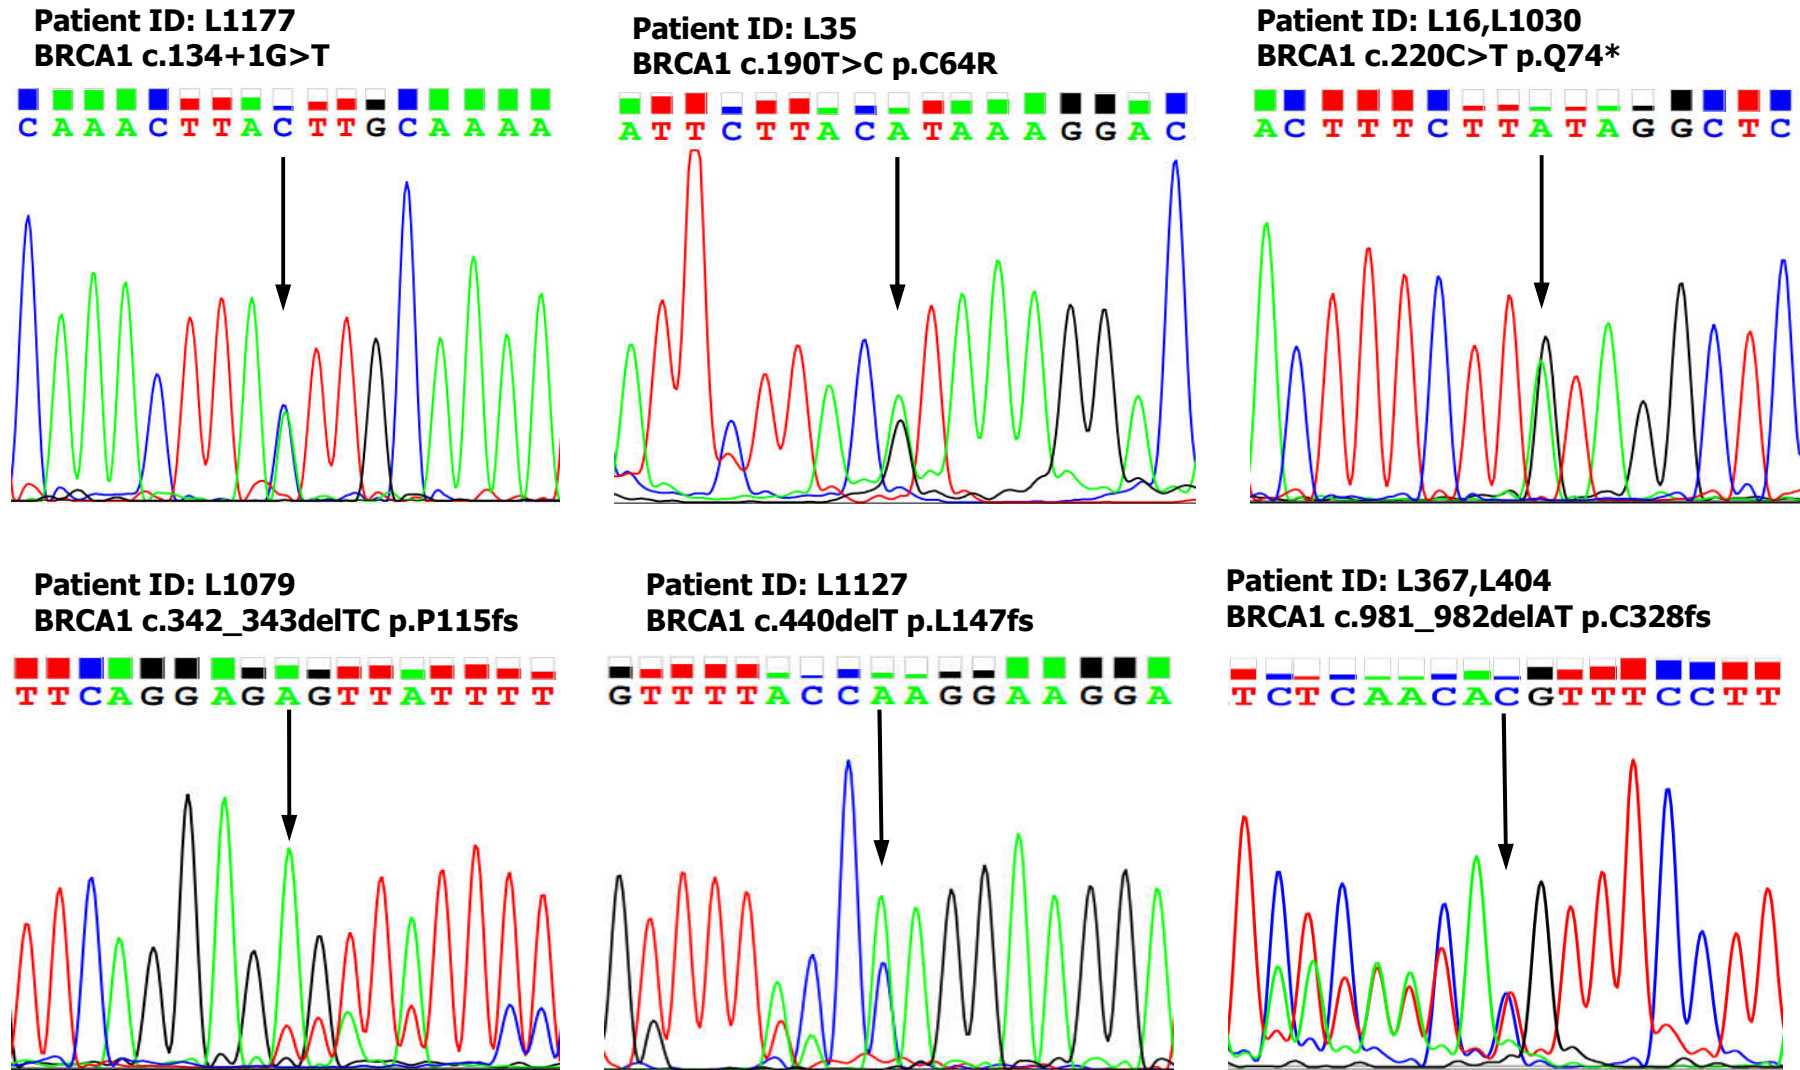

**Patient ID: L1029**  
**BRCA1 c.1012A>T p.K338\***

T A C C T T T T T T C T G T G C

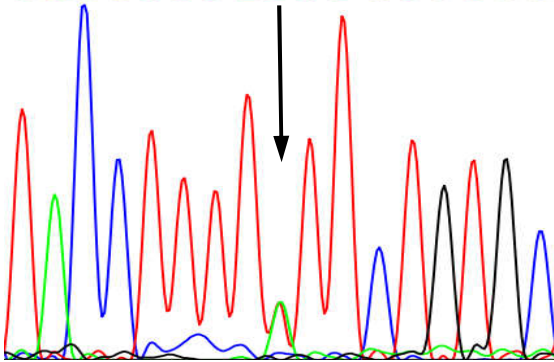

**Patient ID: L202**  
**BRCA1 c.1934delC p.S645fs**

C C C C G G T T G A A C A A C T

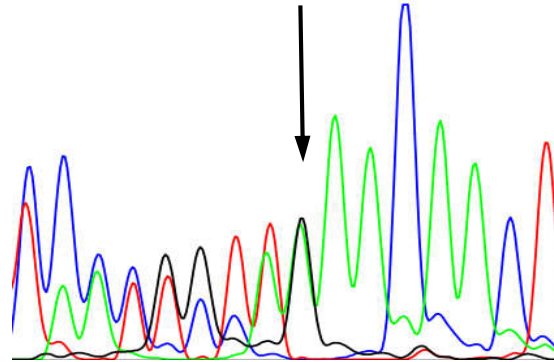

**Patient ID: L397**  
**BRCA1 c.1952dupA p.K652fs**

T T T T C T T T A A C C C C T C C

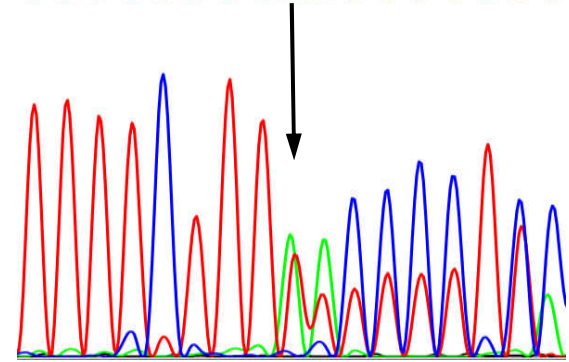

**Patient ID: L71**  
**BRCA1 c. 2269delG p.V757fs**

G C A A A C C C T T C C C C A

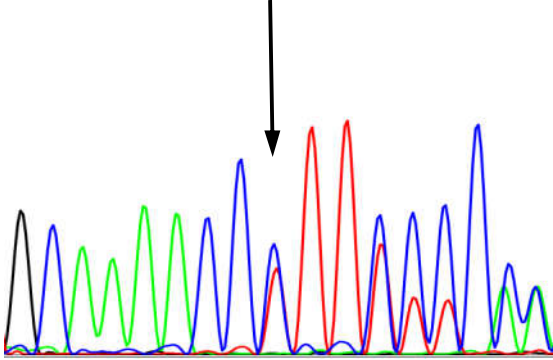

**Patient ID: L461**  
**BRCA1 c.2302delA p.S768fs**

T G A A A T A C T G T A A C C C C

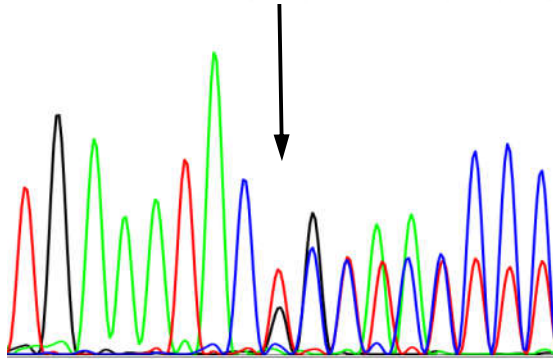

**Patient ID: L1112**  
**BRCA1 c.2553\_2554insGAAAAGTGAA p.L852fs**

T T C A C T T T C C T C C A T T T

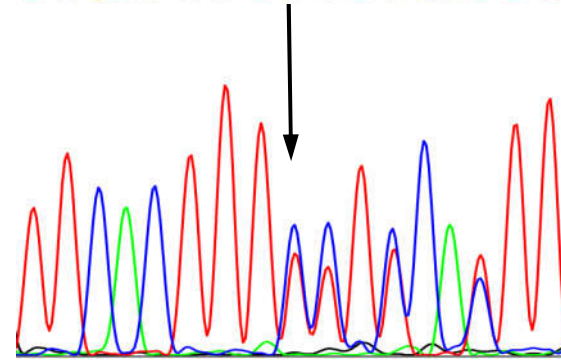

**Patient ID: L1031**  
**BRCA1 c.2679\_2682delGAAA p.K893fs**

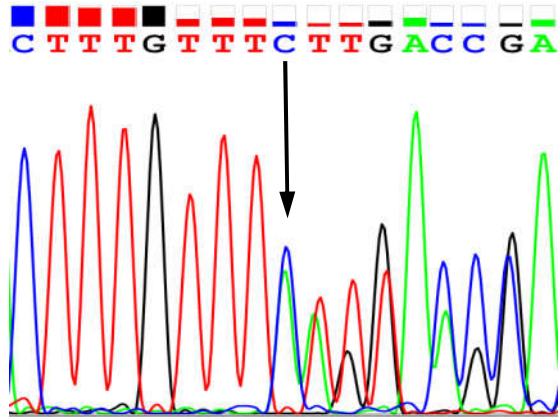

**Patient ID: L72**  
**BRCA1 c.2685\_2686delAA p.P897fs**

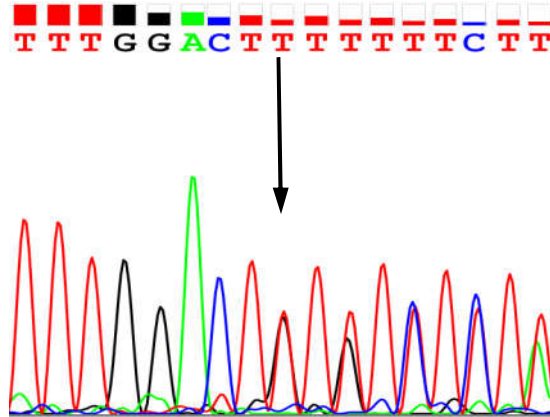

**Patient ID: L1131**  
**BRCA1 c.3114delA p.A1039fs**

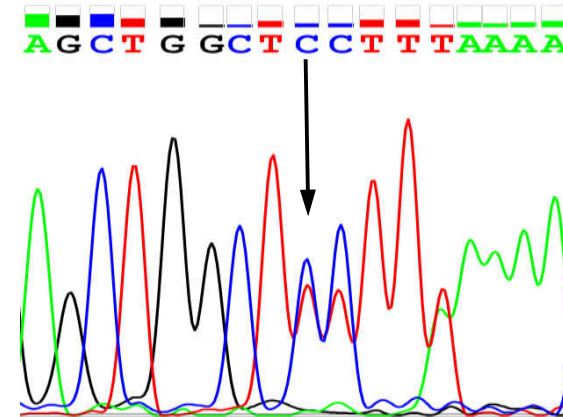

**Patient ID: L237,L1129**  
**BRCA1 c.3288\_3289delAA p.L1098fs**

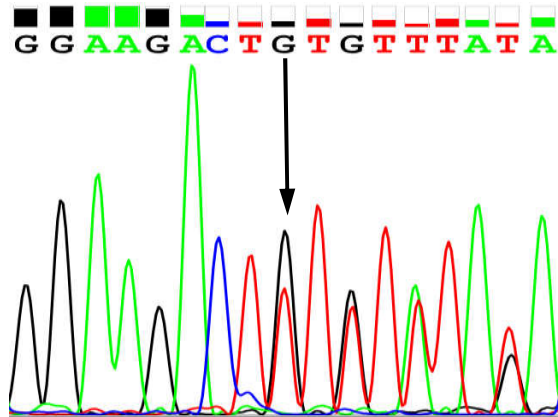

**Patient ID: L238**  
**BRCA1 c.3294delT p.P1099fs**

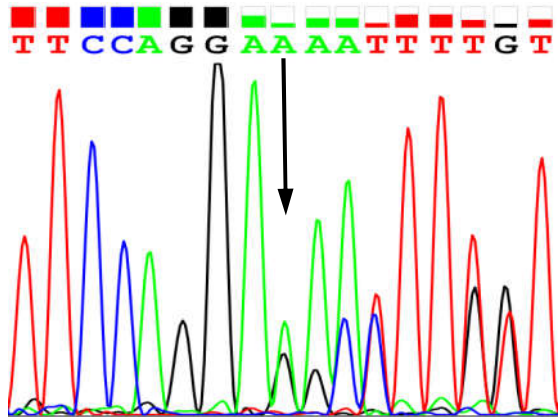

**Patient ID: L287**  
**BRCA1 c.3418\_3419insTGACTACT p.S1140fs**

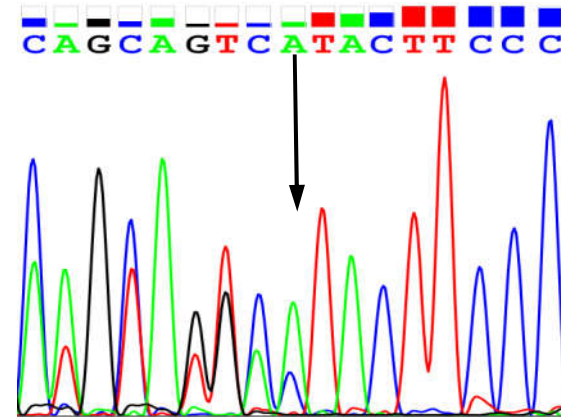

**Patient ID: L1095**  
**BRCA1 c.3599\_3600delAG p.Q1200fs**

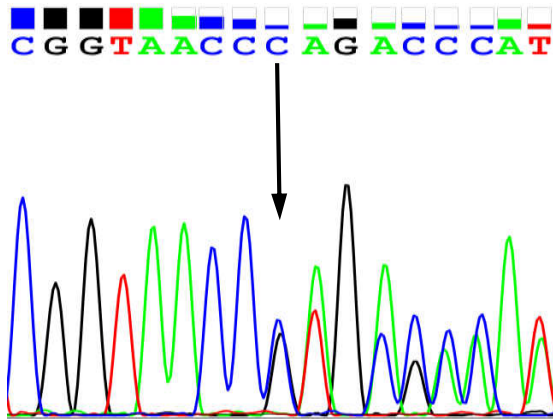

**Patient ID: L102**  
**BRCA1 c.3756\_3759delGTCT p.S1253fs**

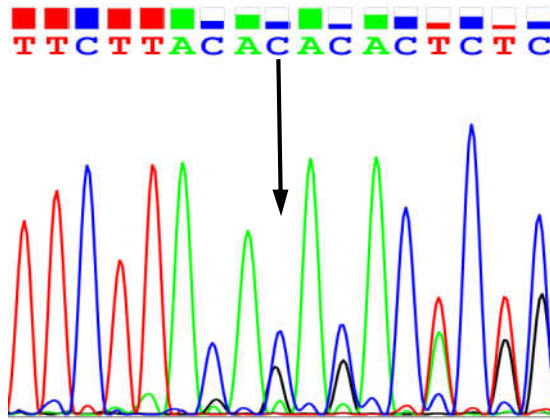

**Patient ID: L377**  
**BRCA1 c.3758\_3759delCT p.S1253fs**

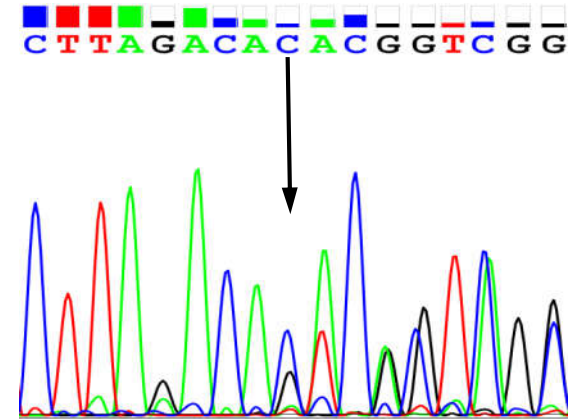

**Patient ID: L260,L85,L340**  
**BRCA1 c.3770\_3771delAG p.E1257fs**

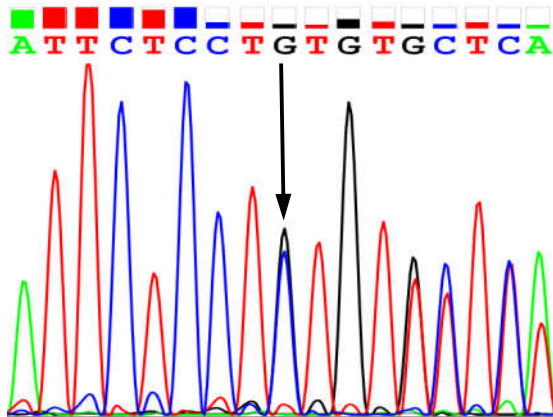

**Patient ID: L1148**  
**BRCA1 c.4097-1G>A**

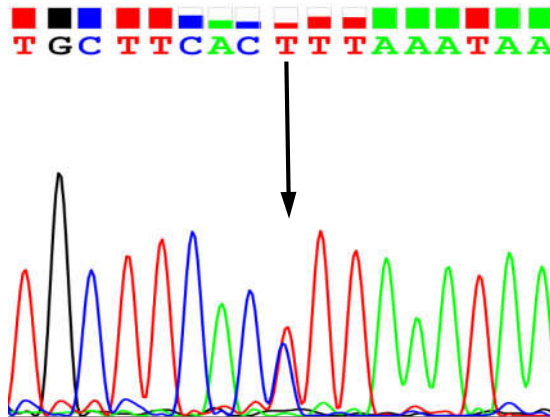

**Patient ID: L154,L1124**  
**BRCA1 c.4185+1G>A**

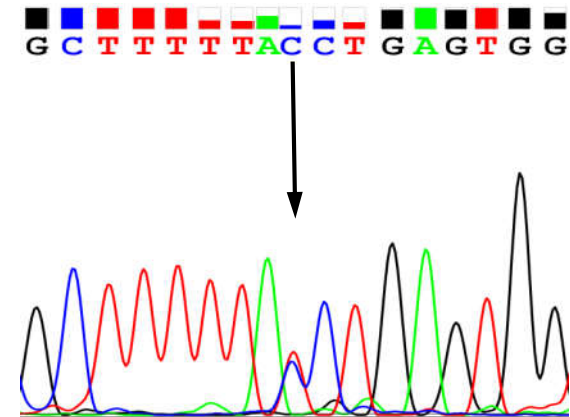

**Patient ID: L88,L140,L1114**  
**BRCA1 c.4712delT p.F1571fs**

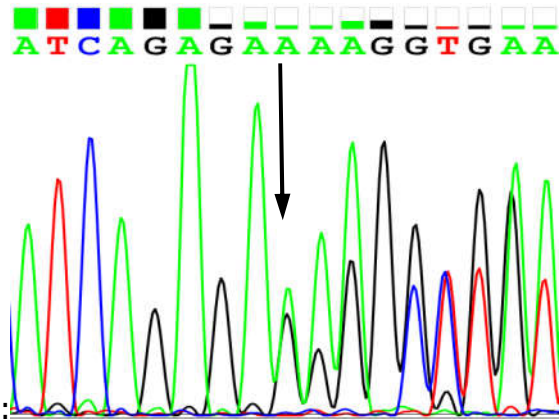

**Patient ID: L322**  
**BRCA1 c.4801A>T p.K1601\***

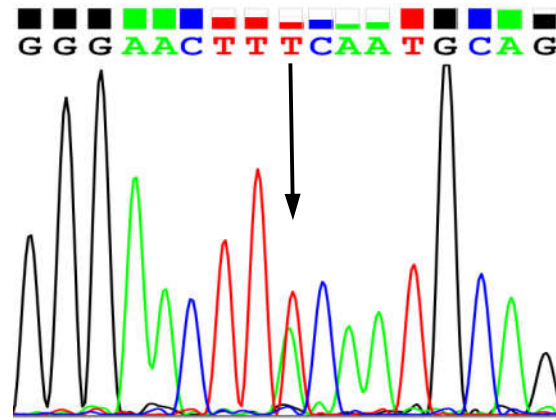

**Patient ID: L1050**  
**BRCA1 c.4886\_4887delinsC p.E1629fs**

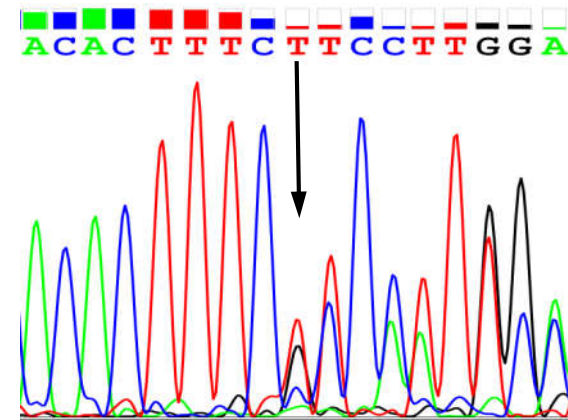

**Patient ID: L223**  
**BRCA1 c.4986+5G>A**

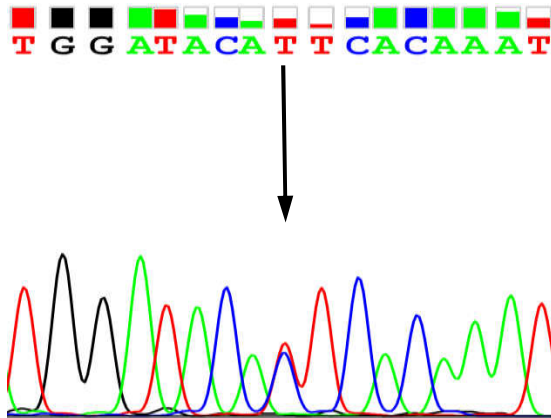

**Patient ID: L409**  
**BRCA1 c.5239C>T p.Q1747\***

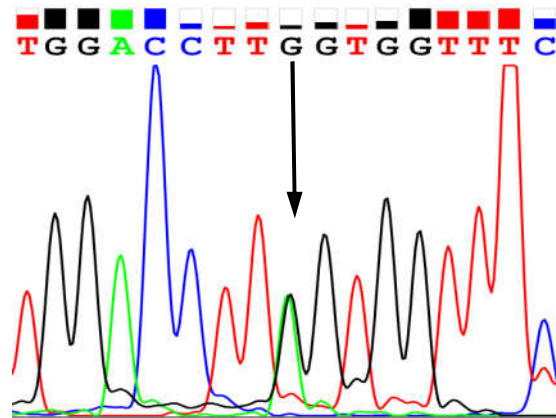

**Patient ID: L138**  
**BRCA1 c.5332+1delG**

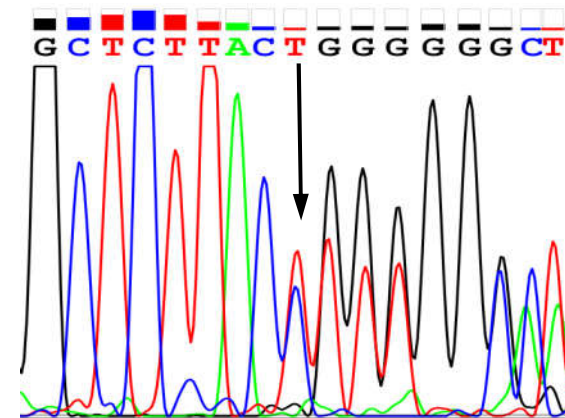

**Patient ID: L173**  
**BRCA2 c.1508\_1509delinsT p.K503fs**

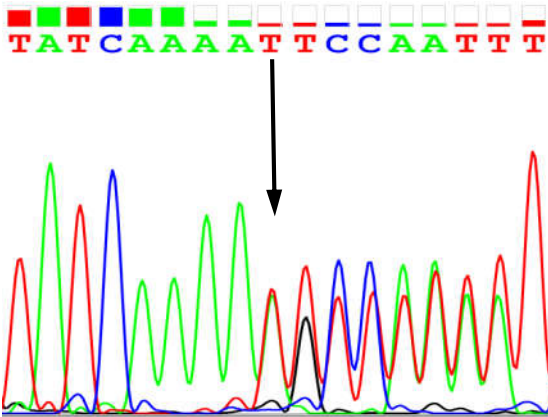

**Patient ID: L37**  
**BRCA2 c.2841\_2849delinsTGTTCTCC p.L947fs**

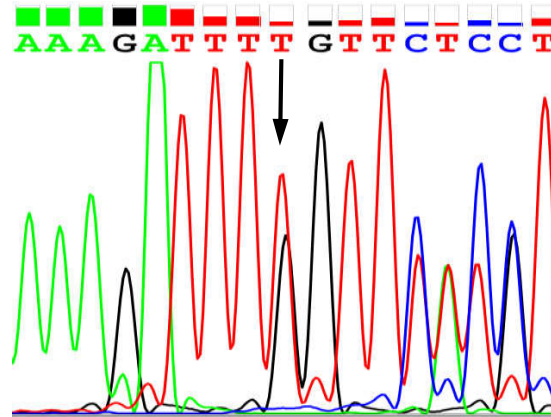

**Patient ID: L424,L511,L217**  
**BRCA2 c.3109C>T p.Q1037\***

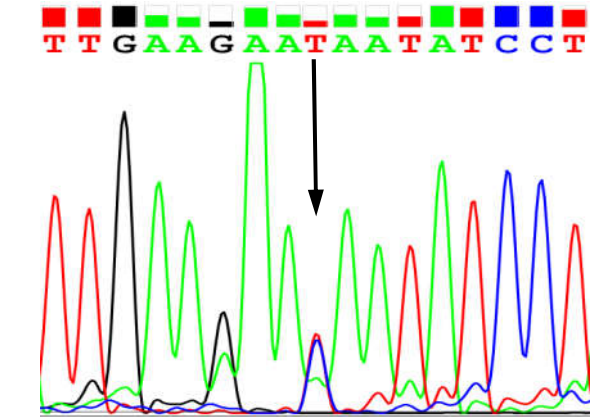

**Patient ID: L172,L339**  
**BRCA2 c.3598\_3599delTG p.C1200fs**

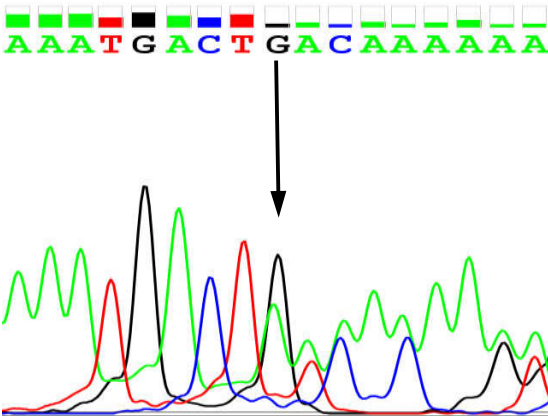

**Patient ID: L193**  
**BRCA2 c.3628\_3629delGA p.D1210fs**

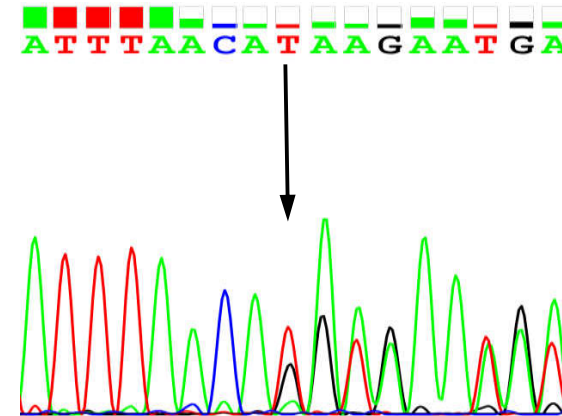

**Patient ID: L1208**  
**BRCA2 c.4415\_4418delAGAA p.K1472fs**

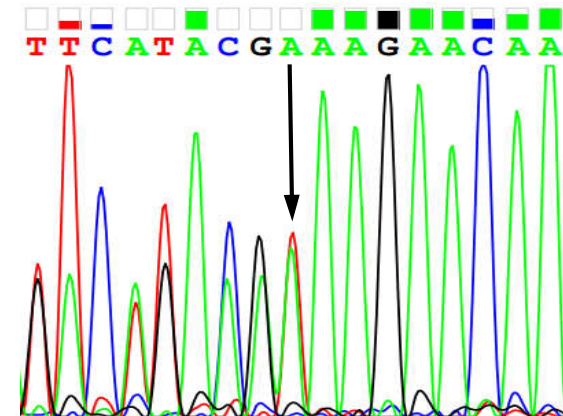

**Patient ID: L187**  
**BRCA2 c.5164\_5165delAG p.S1722fs**

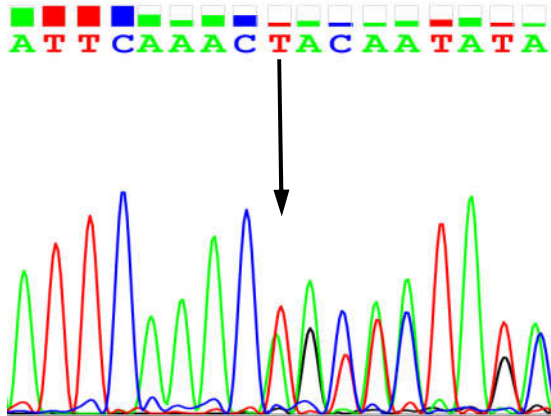

**Patient ID: L44**  
**BRCA2 c.5446dupA p.S1816fs**

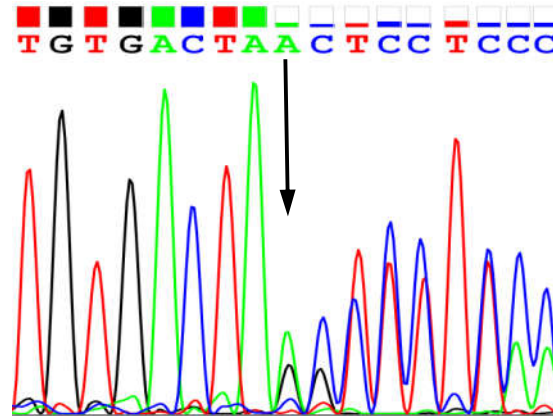

**Patient ID: L408**  
**BRCA2 c.6400\_6401delAA p.N2134fs**

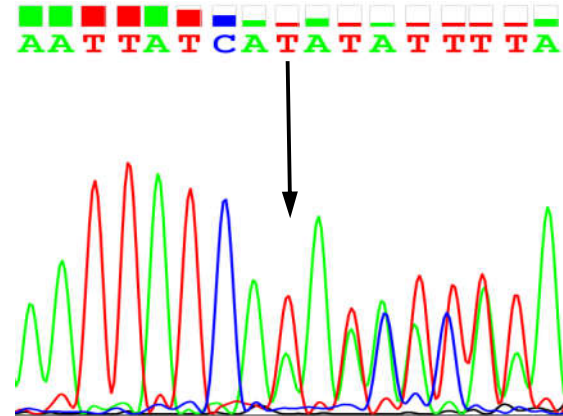

**Patient ID: L124**  
**BRCA2 c.7501C>T p.Q2501\***

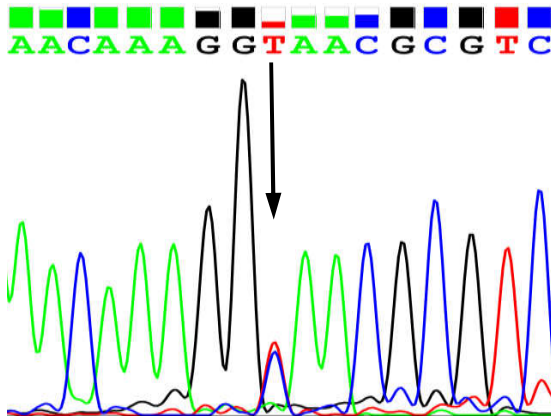

**Patient ID: L440**  
**BRCA2 c.8645\_8646dupAA p.P2883fs**

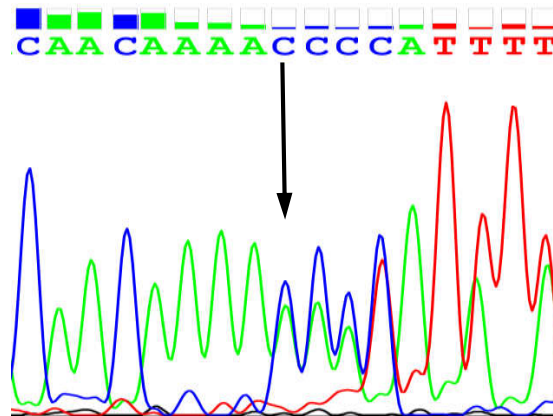

**Patient ID: L28**  
**BRCA2 c.8954-1G>C**

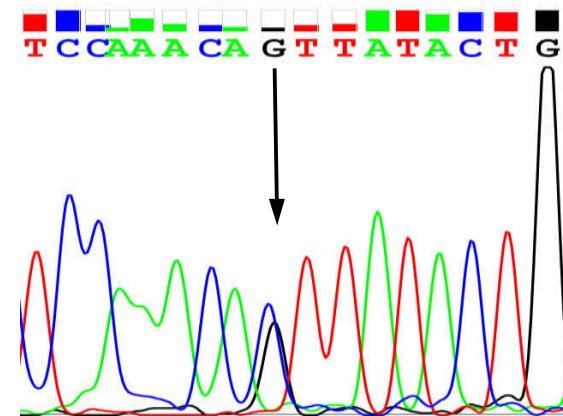

Patient ID: L1116  
BRCA2 c.9253dupA p.T3085fs

■ ■ ■ ■ ■ □ □ □ □ □ □ □ ■ ■ □ □ □ □ □  
G A A A A A A A C C A G G A A A G

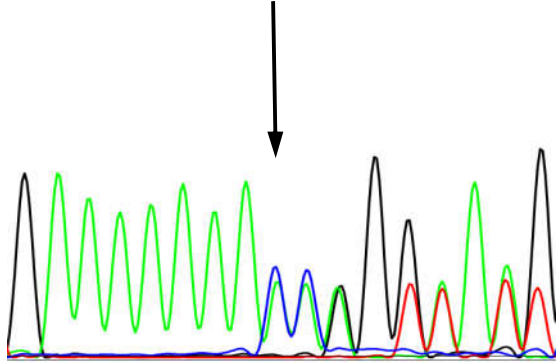

Supplement: MGG3-7-e672-s001.pdf [file MGG3-7-e672-s001.pdf]
